# Supplementary material for: Squamate reptiles challenge paradigms of genomic repeat element evolution set by birds and mammals
Source: PubMed Central journal article supplement (PMC6050309; doi:10.1038/s41467-018-05279-1), 2018-07-17
Supplement: 41467_2018_5279_MOESM3_ESM.pdf [file 41467_2018_5279_MOESM3_ESM.pdf]

## Description of Additional Supplementary Files

**File Name:** Supplementary Data 1

**Description:** Genome sampling statistics for 66 squamate species

**File Name:** Supplementary Data 2

**Description:** Flow cytometry estimates of squamate, bird and mammal genome size (C-value)

**File Name:** Supplementary Data 3

**Description:** Genomic transposable element content in bird and mammal genomes

**File Name:** Supplementary Data 4

**Description:** Repeat element landscape composition for 66 sampled squamate genomes estimated using RepeatMasker

**File Name:** Supplementary Data 5

**Description:** Microsatellite density estimates across 66 squamate species

**File Name:** Supplementary Data 6

**Description:** Statistics of the microsatellite landscape across lineages of squamate reptiles

**File Name:** Supplementary Data 7

**Description:** Statistical analysis of AATAG microsatellite loci seeding by transposable elements for 8 squamate genomes

**File Name:** Supplementary Data 8

**Description:** Adult body mass measurements for 66 sampled squamate species

**File Name:** Supplementary Data 9

**Description:** Multiple species alignment and phylogeny of BovB LINEs for 87 metazoa species or groups

**File Name:** Supplementary Data 10

**Description:** Multiple species alignment and phylogeny of CR1 LINEs for 155 vertebrate species or groups
